# Supplementary material for: Sequence Evaluation and Comparative Analysis of Novel Assays for Intact Proviral HIV-1 DNA
Source: PubMed Central journal article supplement (PMC8094944; doi:10.1128/jvi.01986-20), 2021-02-24
Supplement: JVI.01986-20-s0001.pdf [file JVI.01986-20-s0001.pdf]

## **Supplementary Tables Legend**

**Table S1:** Participant Characteristics. Age, sex, race/ethnicity, time since HIV diagnosis, time since ART initiation, ART regimen at time of donation, and estimated CD4 nadir are provided for the n=39 ART-suppressed participants studied.

**Table S2:** Quantitative Analysis. Table S2 shows the results of the quantitative reservoirs measurements for the 39 ART-suppressed participants studied.

**Table S1:** Individual participant demographics and baseline clinical characteristics

| ID            | Age   | Sex | Race                         | Years since |           | ART at Screening     | Estimated CD4 nadir |
|---------------|-------|-----|------------------------------|-------------|-----------|----------------------|---------------------|
|               |       |     |                              | HIV-1 dx    | first ART |                      |                     |
| 9241          | 40    | M   | White/Hisp                   | 6           | 7         | EVG/cobi/TDF/FTC     | 500                 |
| 9242          | 43    | M   | White/Hisp                   | 3           | 3         | EVG/cobi/ TDF/FTC    | 450                 |
| 9243          | 29    | M   | Amer Indian/Hisp             | 5           | 5         | RPV/TDF/FTC          | 350                 |
| 9244          | 36    | M   | Amer Indian/Non-<br>Hispanic | 9           | 5         | EFV/TDF/FTC          | 730                 |
| 9246          | 30    | M   | Black                        | 5           | 5         | EVG/cobi/<br>TAF/FTC | 500                 |
| 9247          | 31    | M   | Black                        | 6           | 6         | EVG/cobi/<br>TAF/FTC | 600                 |
| 9252          | 51    | F   | Black                        | 11          | 11        | EFV/TDF/FTC          | 270                 |
| 9254          | 48    | M   | White                        | 21          | 21        | EVG/cobi/<br>TAF/FTC | 590                 |
| 9255          | 30    | M   | White                        | 5           | 4         | EVG/cobi/<br>TAF/FTC | 779                 |
| B207          | 48    | M   | White/Hisp                   | 12          | 11        | EVG/TDF/FTC          | not available       |
| 603           | 45    | M   | White/Hisp                   | 14          | 12        | EFV/TDF/FTC          | 300                 |
| 605           | 38    | M   | White/Hisp                   | 17          | 16        | RPV/TDF/FTC          | 372                 |
| 5104          | 35    | M   | Black                        | 7           | 7         | BIC/TAF/FTC          | 400                 |
| 5106          | 31    | M   | Black                        | 6           | 6         | EVG/COBI/FTC/TDF     | >350                |
| 5108*         | 52    | M   | White                        | 10          | 10        | EVG/COBI/FTC/TAF     | >300                |
| 5112*         | 30    | M   | White                        | 6           | 5         | EVG/COBI/FTC/TAF     | 350                 |
| 5101          | 52    | M   | Multiple/Hisp                | 12          | 12        | TDF/FTC/EFV          | not available       |
| 5114          | 54    | M   | Black                        | 15          | 15        | ABC/DTG/3TC          | 300                 |
| 5105          | 49    | F   | Black                        | 29          | 29        | FTC/RPV/TDF          | 200                 |
| 5203          | 59    | M   | White                        | 23          | 21        | DTG/RPV              | 500                 |
| 5111          | 55    | M   | White                        | 20          | 16        | EVG/COBI/FTC/TAF     | 400                 |
| 5115          | 36    | M   | Black                        | 6           | 6         | FTC/TAF/DTG          | not available       |
| TSC-124       | 52    | M   | Black                        | 10          | 10        | EFV/TDF/FTC          | not available       |
| TSC-127       | 57    | F   | Multiple/Non-Hisp            | 20          | 20        | EVG/COBI/FTC/TAF     | not available       |
| TSC-125       | 43    | M   | White                        | 18          | 11        | EVG/COBI/FTC/TDF     | not available       |
| TSC-131       | 45    | M   | Multiple                     | 1           | 1         | EFV/TDF/FTC          | not available       |
| TSC-128       | 43    | M   | N/A / Non-Hisp               | 18          | 18        | FTC/RPV/TDF          | not available       |
| UNC-432       | 51    | M   | White                        | 11          | 11        | ABC/DTG/3TC          | 403                 |
| UNC-308       | 53    | M   | White                        | 22          | 16        | DRV/ABC/3TC/NEV/RTV  | 81                  |
| UNC-346       | 51    | M   | White                        | 10          | 9         | EVG/cobi/FTC/TAF     | 168                 |
| UNC-367       | 28    | M   | White                        | 6           | 5         | DRV/cobi/FTC/TAF     | 168                 |
| UNC-412       | 31    | M   | White                        | 8           | 8         | ABC/DTG/3TC          | 354                 |
| UNC-434       | 45    | M   | Other/Hisp                   | 6           | 6         | BIC/FTC/TAF          | 526                 |
| UNC-404       | 25    | M   | Black                        | 2           | 2         | ABC/DTG/3TC          | 308                 |
| UNC-336       | 53    | M   | Black                        | 22          | 20        | EVG/cobi/FTC/TAF     | 462                 |
| UNC-406,425** | 43/44 | M   | Black                        | 1,2         | 1,2       | ABC/DTG/3TC          | 713                 |
| UNC-397       | 34    | M   | Black                        | 10          | 4         | EVG/cobi/FTC/TAF     | not available       |
| UNC-437       | 42    | F   | Black                        | 9           | 8         | EVG/cobi/FTC/TAF     | 350                 |
| UNC-458*      | 42    | F   | Black                        | 11          | 11        | BIC/FTC/TAF          | not available       |

EVG - elvitegravir, cobi - cobicistat, TDF - tenofovir disoproxil fumarate, FTC - emtricitabine, RTV - ritonavir, ABC - abacavir, 3TC - lamivudine, DTG - dolutegravir. BIC - bictegravir RPV - rilpivirine, EFV - efavirenz, TAF - tenofovir alafenamide fumarate, DRV - darunavir, NEV - nevirapine  
 \*These participants harbored non-clade B viruses.  
 \*\*This individual provided 2 donations at 1 year and 2 years following ART initiation.

Table S2: Quantitative Analysis

| ID               | Infant proviruses per 10 <sup>6</sup> CD4 <sup>+</sup> T cells |                             | IPDA env RRE-defective | IPDA PS-defective     | IPDA Total            | Q2/VOA or QVOA (IUPM) | Total HIV DNA (gag)   | DNA Shearing Index | Cell equivalents assayed (IPDA) | Cell equivalents assayed (QAPCR) | QAPCR PS env per 10 <sup>6</sup> cells (< 38 CT, non-sequence confirmed) | Genotype         | Notes                                     |
|------------------|----------------------------------------------------------------|-----------------------------|------------------------|-----------------------|-----------------------|-----------------------|-----------------------|--------------------|---------------------------------|----------------------------------|--------------------------------------------------------------------------|------------------|-------------------------------------------|
|                  | QAPCR (PS env <sup>+</sup> , sequence confirmed)               | IPDA (PS env <sup>+</sup> ) |                        |                       |                       |                       |                       |                    |                                 |                                  |                                                                          |                  |                                           |
| 9243_wk-2        | 3.47                                                           | amplification failure       | amplification failure  | amplification failure | amplification failure | 0.17                  | 413                   | 34.9               | 1385822                         | 2304000                          | 10.42                                                                    | B                | PS amplification failure                  |
| 9243_wk12        | 1.12                                                           | amplification failure       | amplification failure  | amplification failure | amplification failure | 0.126                 | 437                   | 33.6               | 1031869                         | 2688000                          | 4.46                                                                     | B                | PS amplification failure                  |
| 9244_wk-2        | 2.60                                                           | amplification failure       | amplification failure  | amplification failure | amplification failure | 0.397                 | 359                   | 34.9               | 1430494                         | 3840000                          | 0.26                                                                     | B                | PS amplification failure                  |
| 9244_wk12        | 2.60                                                           | amplification failure       | amplification failure  | amplification failure | amplification failure | 0.354                 | 346                   | 35.2               | 1014435                         | 2030000                          | 0.00                                                                     | B                | PS amplification failure                  |
| 605              | 0.919                                                          | amplification failure       | amplification failure  | amplification failure | amplification failure | 0.6                   | 294                   | 38.5               | 1191036                         | 6528000                          | 0.00                                                                     | B                | PS amplification failure                  |
| 5108             | 9.90                                                           | amplification failure       | amplification failure  | amplification failure | amplification failure | -                     | 224                   | 32.1               | 1061720                         | 1920000                          | 3.65                                                                     | G                | env amplification failure                 |
| 5112             | 3.91                                                           | amplification failure       | amplification failure  | amplification failure | amplification failure | -                     | 363                   | 33.2               | 1263070                         | 1536000                          | 0.65                                                                     | A1               | env amplification failure                 |
| 5106             | 7.29                                                           | amplification failure       | amplification failure  | amplification failure | amplification failure | -                     | 22                    | 32.2               | 1079568                         | 1920000                          | 34.90                                                                    | B                | env amplification failure                 |
| 9241             | 0.25                                                           | amplification failure       | amplification failure  | amplification failure | amplification failure | 0.743                 | 696                   | 33.4               | 1059815                         | 960000                           | 19.79                                                                    | B                | env amplification failure                 |
| 9242_wk-2        | 9.90                                                           | 397                         | 650                    | 517                   | 1534                  | 0.761                 | 955                   | 36.7               | 1118546                         | 3840000                          | 22.52                                                                    | B                | env polymorphism preventing robust gating |
| 9242_wk12        | 8.07                                                           | 373                         | 745                    | 573                   | 1691                  | 0.493                 | 1107                  | 36.6               | 1266640                         | 3840000                          | 19.53                                                                    | B                | env polymorphism preventing robust gating |
| 5101             | 5.21                                                           | 87                          | 473                    | 2045                  | 2605                  | -                     | 406                   | 44.4               | 647294                          | 768000                           | 88.54                                                                    | B                | env polymorphism preventing robust gating |
| 9252_wk-2        | 8.52                                                           | 64                          | 379                    | 260                   | 703                   | 1.709                 | 449                   | 35.2               | 1118546                         | 2112000                          | 1.42                                                                     | B                | env polymorphism preventing robust gating |
| 9252_wk12        | 3.04                                                           | 59                          | 368                    | 242                   | 669                   | 1.47                  | 389                   | 34.2               | 1266640                         | 2304000                          | 3.47                                                                     | B                | env polymorphism preventing robust gating |
| 5114             | 4.17                                                           | 59                          | 570                    | 610                   | 1239                  | -                     | 666                   | 35.2               | 547862                          | 960000                           | 16.67                                                                    | B                | PS polymorphism preventing robust gating  |
| B207             | 11.3                                                           | 1153                        | 1449                   | 1534                  | 3314                  | 13.0                  | 3047                  | 36.7               | 1021616                         | 1152000                          | 9.55                                                                     | B                | No gating issues                          |
| 5105             | 3.47                                                           | 45                          | 376                    | 493                   | 914                   | -                     | 604                   | 32.1               | 794263                          | 864000                           | 13.89                                                                    | B                | No gating issues                          |
| 5203             | 39.06                                                          | 56                          | 118                    | 307                   | 481                   | -                     | 173                   | 36                 | 932919                          | 384000                           | 54.69                                                                    | B                | No gating issues                          |
| 9255_wk-2        | 6.51                                                           | 76                          | 261                    | 162                   | 499                   | 1.89                  | 387                   | 34.1               | 1267573                         | 3072000                          | 0.00                                                                     | B                | No gating issues                          |
| 9255_wk12        | 7.49                                                           | 66                          | 232                    | 231                   | 529                   | 1.4                   | 414                   | 44.3               | 483521                          | 3072000                          | 0.00                                                                     | B                | No gating issues                          |
| 603              | 0.95                                                           | 41                          | 490                    | 278                   | 909                   | 3.75                  | 596                   | 34.7               | 1294870                         | 6448000                          | 2.72                                                                     | B                | No gating issues                          |
| 5104             | 215.28                                                         | 233                         | 288                    | 214                   | 735                   | -                     | 546                   | 30.1               | 1126208                         | 576000                           | 262.15                                                                   | B                | No gating issues                          |
| UNC-308          | 4.17                                                           | 204                         | 2088                   | 785                   | 3077                  | 0.854                 | 2676                  | 33.1               | 1157749                         | 480000                           | 20.83                                                                    | B                | No gating issues                          |
| UNC-346          | 12.25                                                          | 85                          | 970                    | 495                   | 1550                  | 1.465                 | 966                   | 32.2               | 1157347                         | 852900                           | 59.74                                                                    | B                | No gating issues                          |
| UNC-367          | 5.21                                                           | 1049                        | 649                    | 1995                  | 4626                  | 1235                  | 36                    | 867048             | 960000                          | 39.58                            | B                                                                        | No gating issues |                                           |
| UNC-404          | 0.37                                                           | 328                         | 88                     | 61                    | 477                   | 0.816                 | 277                   | 35.4               | 1010500                         | 2688000                          | 2.98                                                                     | B                | No gating issues                          |
| UNC-412          | 0.74                                                           | 22                          | 218                    | 257                   | 497                   | 0.553                 | 190                   | 34.5               | 550541                          | 1344000                          | 8.18                                                                     | B                | No gating issues                          |
| UNC-406,425_wk48 | 0                                                              | 124                         | 19                     | 33                    | 176                   | 0.827                 | 214                   | 50.8               | 1379079                         | 1804800                          | 0.00                                                                     | B                | No gating issues                          |
| UNC-406,425_wk96 | 0.00                                                           | 47                          | 42                     | 61                    | 150                   | 0.279                 | 114                   | 40.2               | 827062                          | 2265600                          | 3.09                                                                     | B                | No gating issues                          |
| UNC-432          | 1.13                                                           | 31                          | 977                    | 135                   | 1143                  | 0.164                 | 1168                  | 36.8               | 835075                          | 883200                           | 64.54                                                                    | B                | No gating issues                          |
| UNC-434          | 4.69                                                           | 203                         | 424                    | 194                   | 821                   | 0.558                 | 772                   | 41.3               | 950662                          | 1920000                          | 11.98                                                                    | B                | No gating issues                          |
| UNC-458          | 0.00                                                           | 5                           | 10                     | 49                    | 64                    | 0.452                 | 341                   | 39.8               | 758396                          | 652800                           | 41.36                                                                    | A1               | No gating issues                          |
| 9246             | 1.3                                                            | 86                          | 162                    | 162                   | 430                   | 0.066                 | 215                   | 38.6               | 862542                          | 768000                           | 39.06                                                                    | B                | No gating issues                          |
| 9247             | 27.08                                                          | 7                           | 32                     | 48                    | 87                    | 0.0249                | 20                    | 34.1               | 1016764                         | 860000                           | 31.25                                                                    | B                | No gating issues                          |
| 5111             | 6.0                                                            | 38                          | 99                     | 394                   | -                     | -                     | 171                   | 31.5               | 983221                          | 1344000                          | 6.70                                                                     | B                | No gating issues                          |
| 5115             | 0                                                              | 368                         | 26                     | 614                   | -                     | -                     | 452                   | 32.6               | 962697                          | 6376000                          | 1.30                                                                     | B                | No gating issues                          |
| TSC 124          | 0                                                              | 5                           | 18                     | 56                    | -                     | -                     | 20                    | 32.9               | 728487                          | 2496000                          | 1.60                                                                     | B                | No gating issues                          |
| TSC 127          | 14.42                                                          | 91                          | 1045                   | 1734                  | 2970                  | -                     | 1241                  | 33.8               | 950293                          | 624000                           | 40.06                                                                    | B                | No gating issues                          |
| TSC 125          | 1.86                                                           | 116                         | 756                    | 583                   | 1457                  | -                     | 724                   | 33.1               | 929629                          | 537600                           | 5.58                                                                     | B                | No gating issues                          |
| TSC 131          | 0                                                              | 20                          | 53                     | 96                    | 23                    | -                     | -                     | 32.2               | 1086317                         | 768000                           | 2.60                                                                     | B                | No gating issues                          |
| TSC 128          | 1.60                                                           | 271                         | 696                    | 632                   | 1601                  | -                     | 187                   | 27.8               | 584973                          | 2496000                          | 7.21                                                                     | B                | No gating issues                          |
| UNC-336          | 0                                                              | 10                          | 133                    | 189                   | 332                   | 0.021                 | 153                   | 33.7               | 829566                          | 1574400                          | 0.00                                                                     | -                | No gating issues                          |
| UNC-397          | 0                                                              | 5                           | 62                     | 9                     | 76                    | 0.021                 | 87                    | 35.5               | 1620390                         | 1881600                          | 0.00                                                                     | -                | No gating issues                          |
| UNC-437          | 0                                                              | 108                         | 357                    | 170                   | 635                   | 0.604                 | amplification failure | 35.1               | 971848                          | 1344000                          | 20.09                                                                    | B                | No gating issues                          |
| 9254             | 27.34                                                          | 40                          | 242                    | 85                    | 367                   | -                     | 172                   | 34.2               | 808635                          | 1536000                          | 33.85                                                                    | B                | No gating issues                          |
